# Supplementary material
Source: PubMed Central journal article supplement (PMC2095723)
Supplement: gut_2007.119446_2.pdf [file gut_2007.119446_2.pdf]

### TABULATED SUMMARY OF DOUBLE BLIND THERAPEUTIC TRIALS IN IBS

|                        | Author year   | Study design                                            | Treatment population         | Treatment                                                                                                                                 | Results                                                                                                                                         |
|------------------------|---------------|---------------------------------------------------------|------------------------------|-------------------------------------------------------------------------------------------------------------------------------------------|-------------------------------------------------------------------------------------------------------------------------------------------------|
| <b>Anti-spasmodics</b> | Wheatley 1976 | Crossover placebo-controlled                            | 29 (no diagnostic criteria)  | Dicyclomine 20mg tid                                                                                                                      | No change in pain symptoms - investigator assessed                                                                                              |
|                        | Ritchie 1979  | Randomised placebo-controlled, multiple agents          | 96 (no diagnostic criteria)  | Hyoscamine 10mg qid vs ispaghula vs lorazepam, 12 weeks                                                                                   | No change in global symptoms - investigator and patient assessed                                                                                |
|                        | Fielding 1980 | Randomised placebo-controlled                           | 60                           | Trimebutine 200mg tid plus high fibre vs high fibre, 6 months                                                                             | No advantage of trimebutine plus high fibre over placebo plus high fibre                                                                        |
|                        | Luttecke 1980 | Randomised placebo-controlled crossover; three trials - | Trial 1,2: 45<br>Trial 3: 40 | Trial1: trimebutine 200mg tid, 3 days<br>Trial2: trial 100mg tid, 3 days<br>Trial3: trimebutine 200mg tid vs mebeverine 100mg qid, 2 week | High dose trimebutine improves pain and distension ( $p < 0.001$ ) – no significant effect with low dose. No difference between anti-spasmodics |
|                        | Page 1981     | Randomised placebo-controlled                           | 71 (no diagnostic criteria)  | Dicyclomine 40mg qid, 2 weeks                                                                                                             | Improved global and pain/bowel function                                                                                                         |
|                        | Ferrari 1986  | Randomised trial of two anti-                           | 40                           | Cimetropium 50mg bid vs otilonium                                                                                                         | Improved pain and global score vs baseline (both                                                                                                |

|                        |                  |                                                           |                |                                                                            |                                                                |
|------------------------|------------------|-----------------------------------------------------------|----------------|----------------------------------------------------------------------------|----------------------------------------------------------------|
|                        |                  | spasmodics                                                |                | 20mg bid, 6 weeks                                                          | p<0.05)                                                        |
| <b>Anti-spasmodics</b> | Ghidini 1986     | Randomised placebo-controlled, multiple agents            | 90             | Rociverine 20mg tid vs trimebutine 100mg tid, 60 days                      | Improved pain and bowel function both agents over placebo      |
|                        | Kruis 1986       | Randomised placebo-controlled, multiple agents            | 120            | Mebeverine 135mg tid vs open label wheat bran 5gm tid vs placebo, 16 weeks | No advantage over placebo for mebeverine                       |
|                        | Tudor 1986       | Crossover placebo-controlled trial of two anti-spasmodics | 45             | Mebeverine 135mg tid vs alverine 60mg tid, 4 weeks                         | Improved pain for both drugs vs placebo (p<0.02 for both)      |
|                        | Piai 1987        | Randomised placebo-controlled                             | 30 (all c-IBS) | Cimetropium 50mg tid, 12 weeks                                             | Improved global score (p<0.01)                                 |
|                        | Centonze 1988    | Randomised placebo-controlled                             | 48             | Cimetropium 50mg tid, 6 months                                             | Improved pain and global score (both p<0.01)                   |
|                        | Gilvarry 1989    | Randomised placebo-controlled                             | 24             | Pirenzapine 50mg bid, 4 weeks                                              | No advantage over placebo                                      |
|                        | Dobrilla 1990    | Randomised placebo-controlled                             | 70             | Cimetropium 50mg tid, 12 weeks                                             | Improved pain (p=0.0005) and global score (p=0.039)            |
|                        | Schaffstein 1990 | Randomised placebo-controlled                             | 199            | Trimebutine 200mg tid vs mebeverine 135mg tid, 28 days                     | Improved pain with both agents (p=0.0001) compared to baseline |
|                        | Baldi 1991       | Randomised placebo-controlled                             | 72             | Otilonium 40mg tid, 4 weeks                                                | Improved pain and bloating (both p<0.02)                       |
|                        | Awad 1995        | Randomised                                                | 40 (Rome I)    | Pinaverium 50mg                                                            | Improved pain and bowel                                        |

|                        |                 |                               |                         |                                        |                                                                                               |
|------------------------|-----------------|-------------------------------|-------------------------|----------------------------------------|-----------------------------------------------------------------------------------------------|
|                        |                 | placebo-controlled            |                         | tid, 3 weeks                           | function (p<0.01)                                                                             |
| <b>Anti-spasmodics</b> | Battaglia 1998  | Randomised placebo-controlled | 378                     | Otilonium 40mg tid, 15 weeks           | Improved pain (p<0.01), distension (p<0.05) and global score (p<0.01)                         |
|                        | Glende 2002     | Randomised placebo-controlled | 378 (Rome I)            | Otilonium 40mg tid, 15 weeks           | No significant advantage over placebo                                                         |
|                        |                 |                               |                         |                                        |                                                                                               |
|                        |                 |                               |                         |                                        |                                                                                               |
| <b>Antidepressants</b> | Heefner 1978    | Randomised placebo-controlled | 44                      | Desipramine up to 150mg, 8 weeks       | Improved QoL (92% vs 60%)                                                                     |
|                        | Steinhart 1981  | Crossover placebo-controlled  | 14                      | Amitriptyline up to 50mg, 4 weeks      | "Improved" symptoms, p<0.08                                                                   |
|                        | Myren 1982      | Randomised placebo-controlled | 61                      | Trimipramine up to 25mg, 4 weeks       | Improved global symptoms 83% vs 68%                                                           |
|                        | Myren 1984      | Randomised placebo-controlled | 428                     | Trimipramine up to 60mg, 6 weeks       | Improved pain with higher doses, but tiredness in early stage                                 |
|                        | Greenbaum 1987  | Crossover placebo-controlled  | 28 (9 c-IBS, 19 d-IBS)  | Desipramine 150mg vs atropine, 6 weeks | Global improvement 54% vs 21% atropine vs 18% placebo; d-IBS did best                         |
|                        | Vij 1991        | Randomised placebo-controlled | 50 (predominantly male) | Doxepin up to 75mg, 6 weeks            | Improved pain and bowel function – patient assessed                                           |
|                        | Tanum 1996      | Randomised placebo-controlled | 49                      | Mianserin 120mg, 7 weeks               | Improved pain and overall function (p<0.001)                                                  |
|                        | Rajgopalan 1998 | Randomised placebo-controlled | 40 (Rome I)             | Amitriptyline up to 75mg, 12 weeks     | Improved pain and global symptoms (p<0.01), abdominal pain (p<0.05) and functioning (p<0.001) |

|                       |                |                                                       |                                          |                                                                   |                                                                                              |
|-----------------------|----------------|-------------------------------------------------------|------------------------------------------|-------------------------------------------------------------------|----------------------------------------------------------------------------------------------|
| <b>SSRIs</b>          | Creed 2003     | Randomised placebo-controlled, multiple interventions | 257 (Rome I)                             | Paroxetine 20mg vs psychotherapy vs standard care, 12 weeks       | Global improvement ( $p < 0.001$ ) and physical aspects QoL ( $p < 0.001$ ) vs standard care |
|                       | Kuiken 2003    | Randomised placebo-controlled                         | 40 (Rome I)                              | Fluoxetine 20mg, 6 weeks                                          | Non-significant improvements in pain and global score                                        |
|                       | Tabas 2004     | Randomised placebo-controlled, multiple agents        | 110 (Rome I)                             | Paroxetine 10-20mg + high fibre diet vs high fibre diet, 12 weeks | Global improvement ( $p < 0.01$ ) and less food avoidance ( $p < 0.03$ )                     |
|                       | Tack 2006      | Crossover placebo-controlled                          | 23 (Rome II, 4 c-IBS, 5 d-IBS, 14 a-IBS) | Citalopram up to 40mg, 6 weeks                                    | Improved pain, bloating QoL (all $p < 0.05$ ). (Effect independent of mood.)                 |
|                       |                |                                                       |                                          |                                                                   |                                                                                              |
| <b>Bulking agents</b> | Soltoft 1976   | Randomised placebo-controlled                         | 52                                       | Wheat bran 30gm/day, 6 weeks                                      | No advantage over placebo                                                                    |
|                       | Manning 1977   | Randomised, NOT placebo-controlled                    | 24                                       | Wheat fibre 20gm/day, 6 weeks                                     | Improved pain and bowel function                                                             |
|                       | Ritchie 1979   | Randomised placebo-controlled                         | 24                                       | Ispaghula 30mg bid, 12 weeks                                      | Improved ease of bowel opening                                                               |
|                       | Logstreth 1981 | Randomised placebo-controlled                         | 60                                       | Psyllium 6.4gm tid, 8 weeks                                       | No advantage over placebo                                                                    |
|                       | Golecha 1982   | Crossover placebo-controlled                          | 26                                       | Ispaghula – uncertain dose, 3 weeks                               | Improved ease of bowel opening                                                               |

|                       |              |                               |                       |                                                   |                                                                                     |
|-----------------------|--------------|-------------------------------|-----------------------|---------------------------------------------------|-------------------------------------------------------------------------------------|
| <b>Bulking agents</b> | Arthurs 1983 | Randomised placebo-controlled | 78                    | Ispaghula-polaxamer, 2 sachets/day, 4 weeks       | No advantage over placebo                                                           |
|                       | Arfmann 1985 | Crossover placebo-controlled  | 18                    | Wheat bran 30gm/day, 6 weeks                      | No advantage over placebo                                                           |
|                       | Lucey 1987   | Crossover placebo-controlled  | 28                    | Wheat bran 12.8gm/day, 12 weeks                   | No advantage over placebo                                                           |
|                       | Prior 1987   | Randomised placebo-controlled | 80                    | Ispaghula 30mg tid, 12 weeks                      | Global improvement 82% vs 53%, bowel function improved (p<0.03 both)                |
|                       | Cook 1990    | Crossover placebo-controlled  | 9                     | Corn fibre 10gm bid, 12 weeks                     | No advantage over placebo                                                           |
|                       | Jalihal 1990 | Crossover placebo-controlled  | 20                    | Ispaghula 30mg qid, 4 weeks                       | Improved global score and bowel satisfaction (both p<0.001)                         |
|                       | Fowlie 1992  | Randomised placebo-controlled | 49 (c-IBS, a-IBS)     | Fibre (soluble and insoluble) 4.1gm qid, 3 months | No advantage over placebo                                                           |
|                       | Toskes 1993  | Crossover placebo-controlled  | 23 (all IBS subtypes) | Calcium polycarbonate 1.5gm qid, 12 weeks         | c-IBS and a-IBS patients "preferred" active treatment, no symptom differences found |
|                       | Snook 1994   | Crossover placebo-controlled  | 71                    | Wheat bran 40gm/day, 7 weeks                      | No advantage over placebo                                                           |
|                       | Aller 2004   | Randomised                    | 56 (Rome II)          | Fibre 10.4gm qid                                  | Improved pain, bowel                                                                |

|                                 |                |                               |                    |                                           |                                                                                                                                               |
|---------------------------------|----------------|-------------------------------|--------------------|-------------------------------------------|-----------------------------------------------------------------------------------------------------------------------------------------------|
|                                 |                | placebo-controlled            |                    | vs 30gm/day, 3 months                     | function and global scores (all p<0.05)                                                                                                       |
|                                 | Rees 2005      | Randomised placebo-controlled | 28 (Rome I, c-IBS) | Coarse wheat bran 10-20gm qid, 8-12 weeks | No improvement in symptoms, increased stool weight (p<0.05)                                                                                   |
| <b>Anti-diarrhoeals</b>         |                |                               |                    |                                           |                                                                                                                                               |
|                                 | Cann 1984      | Crossover placebo-controlled  | 28                 | Loperamide 2-12mg/day, 5 weeks            | Improved stool frequency and consistency and urgency (all p<0.05)                                                                             |
|                                 | Hovdenak 1987  | Randomised placebo-controlled | 58                 | Loperamide 4mg/day, 3 weeks               | Improvement in patients with painless diarrhoea (stool frequency and consistency, p<0.01) and a-IBS (stool frequency and consistency, p<0.02) |
|                                 | Lavo 1987      | Randomised placebo-controlled | 25 (d-IBS)         | Loperamide 2-8mg/day                      | Improved global score (p<0.03), pain (p<0.02), stool consistency (p<0.001) and urgency (p<0.03)                                               |
|                                 | Efskind 1996   | Randomised placebo-controlled | 69                 | Loperamide 2-6mg/day, 5 weeks             | Improved stool frequency and consistency (p<0.05)                                                                                             |
| <b>5HT<sub>4</sub> agonists</b> |                |                               |                    |                                           |                                                                                                                                               |
|                                 | Lefkowitz 1999 | Randomised placebo-controlled | 799 (Rome I c-IBS) | Tegaserod 4mg and 12mg qid, 12 weeks      | Improved pain and bowel frequency (both p<0.01)                                                                                               |
|                                 | Whorwell 2000  | Randomised                    | 799 (Rome I)       | Tegaserod 2 or                            | Retrospectively defined                                                                                                                       |

|                                    |                     |                               |                         |                                  |                                                                                                                                 |
|------------------------------------|---------------------|-------------------------------|-------------------------|----------------------------------|---------------------------------------------------------------------------------------------------------------------------------|
|                                    |                     | placebo-controlled            |                         | 6mg bid, 12 weeks                | end-point of global improvement                                                                                                 |
| <b>5HT<sub>4</sub> agonists</b>    | Muller-Lissner 2001 | Randomised placebo-controlled | 881 (Rome I)            | Tegaserod 2 or 6mg bid, 12 weeks | Global improvement over placebo 12.7% and 11.8% for 2 and 6mg respectively. Also improved pain and bowel function (both p<0.05) |
|                                    | Kellow 2003         | Randomised placebo-controlled | 520 (Rome I)            | Tegaserod 6mg bid, 12 weeks      | Global improvement 62% vs 44% (tegaserod vs placebo, p<0.0001). Improved pain and bowel function                                |
|                                    | Novick 2003         | Randomised placebo-controlled | 1519 (Rome I)           | Tegaserod 6mg bid, 12 weeks      | Improved global score (p<0.05) and rapid relapse on withdrawal                                                                  |
|                                    | Nyhlin 2004         | Randomised placebo-controlled | 647 (Rome II, no d-IBS) | Tegaserod 6mg bid, 12 weeks      | Improved global state (p<0.0001)                                                                                                |
|                                    | Tack 2004           | Crossover placebo-controlled  | 2660 (Rome II, c-IBS)   | Tegaserod 6mg bid, 4 weeks       | Improved global score and pain (both p<0.0001) and improved aspects of QoL (p<0.05)                                             |
|                                    |                     |                               |                         |                                  |                                                                                                                                 |
| <b>5HT<sub>3</sub> antagonists</b> | Steadman 1994       | Crossover placebo-controlled  | 14 (d-IBS)              | Ondansetron 16mg tid, 4 weeks    | Improved stool consistency (p<0.05)                                                                                             |
|                                    | Goldberg 1996       | Crossover placebo-controlled  | 9 (no criteria used)    | Ondansetron 16mg tid, 4 weeks    | Improved pain (p=0.03) and stool consistency (p<0.01)                                                                           |

|  |                |                               |                          |                                                     |                                                                                                                                         |
|--|----------------|-------------------------------|--------------------------|-----------------------------------------------------|-----------------------------------------------------------------------------------------------------------------------------------------|
|  | Maxton 1996    | Crossover placebo-controlled  | 50 (Rome I,              | Ondansetron 4mg tid, 4 weeks                        | Improved stool consistency (p=0.002) and frequency (p=0.035)                                                                            |
|  | Camilleri 1999 | Randomised placebo-controlled | 370 (Rome I, 53% female) | Alosetron 1, 2, 4 or 8mg bid, 12 weeks              | Alosetron 1 and 2mg improved global score in women only (p<0.05). Improved bowel function and urgency in women only, all doses (p<0.05) |
|  | Jones 1999     | Randomised vs mebeverine      | 623 (Rome I)             | Alosetron 1mg bid vs mebeverine 135mg tid, 12 weeks | 58% vs 48% responders at trial end (alosetron vs mebeverine, respectively, p=0.009). Improved bowel function (p<0.01)                   |
|  | Bardhan 1999   | Randomised placebo-controlled | 462 (Rome I, all d-IBS)  | Alosetron 0.1, 0.5 and 2mg bid, 12 weeks            | Improved pain and diarrhoea VAS (p<0.05) for 2mg dose only.                                                                             |
|  | Camilleri 2000 | Randomised placebo-controlled | 647 (Rome I)             | Alosetron 1mg bid, 12 weeks                         | Adequate response in 41% vs 29% (p<0.05). Improved bowel function and urgency (all p<0.05)                                              |
|  | Lembo 2001     | Randomised placebo-controlled | 801 (Rome I)             | Alosetron 1mg bid, 12 weeks                         | Global improvement 76% vs 33% (p<0.01)                                                                                                  |
|  | Camilleri 2001 | Randomised placebo-controlled | 626 (Rome I, all d-IBS)  | Alosetron 1mg bid, 12 weeks                         | Improved pain, bowel function and urgency (all p<0.001)                                                                                 |
|  | Chey 2004      | Randomised placebo-controlled | 714 (Rome I, all d-IBS)  | Alosetron 1mg bid, 48 weeks                         | End trial greater overall relief (p=0.01) and urgency (p<0.001)                                                                         |



|                                        |                |                               |                                                    |                               |                                                                                                                        |
|----------------------------------------|----------------|-------------------------------|----------------------------------------------------|-------------------------------|------------------------------------------------------------------------------------------------------------------------|
|                                        | Lembo 2004     | Randomised placebo-controlled | 492 (Rome II, all d-IBS)                           | Alosetron 1mg bid, 12 weeks   | Improved global score and urgency (both $p<0.001$ )                                                                    |
|                                        | Bradette 2004  | Randomised placebo-controlled | 792 (Rome I, all d-IBS)                            | Cilansetron 2mg tid, 6 months | Improved pain and bowel function at 3 and 6 months (all $p<0.001$ )                                                    |
|                                        | Coremans 2004  | Subset analysis               | 3 month 205 d-IBS (men)<br>6 month 358 d-IBS (men) | Cilansetron 2mg tid, 6 months | Improved pain and bowel function at 3 and 6 months ( $p<0.002$ at least). Global relief only at 3 months ( $p<0.001$ ) |
|                                        |                |                               |                                                    |                               |                                                                                                                        |
|                                        |                |                               |                                                    |                               |                                                                                                                        |
| <b>Other 5HT agents in development</b> | Camilleri 2004 | Randomised placebo-controlled | 48 (Rome II, all c-IBS)                            | Renzapride 1, 2 or 4mg/day    | No change in symptoms, but accelerated colon transit in highest dose ( $p<0.05$ )                                      |
|                                        | Henderson 2004 | Randomised placebo-controlled | 168 (Rome II, all a-IBS)                           | Renzapride 1, 2 or 4mg/day    | No significant advantage over placebo                                                                                  |
|                                        | Meyers 2004    | Randomised placebo-controlled | 510 (Rome II, all c-IBS)                           | Renzapride 2 or 4mg/day       | Increased bowel frequency ( $p<0.005$ ) and consistency ( $p<0.05$ )                                                   |
